# Supplementary material for: Air‐side ammonia stripping coupled to anaerobic digestion indirectly impacts anaerobic microbiome
Source: PubMed Central journal article supplement (PMC6801131; doi:10.1111/1751-7915.13482), 2019-09-18
Supplement: MBT2-12-1403-s002.pdf [file MBT2-12-1403-s002.pdf]

**Table S1.** Number of high quality sequences obtained per sample. Sample name indicates: reactor, period and sampling day.

| <b>Sample</b> | <b><i>Bacteria</i></b> | <b><i>Archaea</i></b> |
|---------------|------------------------|-----------------------|
| R1.P2.133     | 31490                  | 34553                 |
| R1.P2.140     | 24396                  | 80557                 |
| R1.P2.147     | 21946                  | 64055                 |
| R1.P2.210     | 33180                  | 86818                 |
| R1.P2.270     | 24081                  | 100194                |
| R1.P2.300     | 27393                  | 67909                 |
| R1.P3.324     | 31718                  | 66602                 |
| R1.P3.338     | 25552                  | 71550                 |
| R2.P2.133     | 33881                  | 63065                 |
| R2.P2.147     | 24780                  | 49264                 |
| R2.P2.205     | 20788                  | 38201                 |
| R2.P2.301     | 27964                  | 45931                 |
| R2.P4.442     | 25281                  | 20092                 |
| R2.P4.484     | 27671                  | 37294                 |
| R2.P4.491     | 31963                  | 39220                 |
| R2.P6.592     | 28165                  | 40310                 |
| R2.P6.611     | 30716                  | 44003                 |
| R2.P6.637     | 30678                  | 26475                 |
| R2.P7.644     | 27033                  | 67864                 |
| R2.P7.646     | 33502                  | 45524                 |
| R2.P7.652     | 34075                  | 43405                 |
| R2.P7.667     | 24623                  | 27924                 |
| R2.P7.681     | 35086                  | 33278                 |
| R2.P7.688     | 29631                  | 24636                 |
| R2.P7.695     | 31680                  | 28439                 |
| R2.P7.697     | 36301                  | 24034                 |
| R2.P7.704     | 33479                  | 24626                 |
| Average       | 29150                  | 47993                 |
| Total         | 787053                 | 1295823               |
